# Supplementary material for: A resource-efficient tool for mixed model association analysis of large-scale data
Source: bioRxiv or medRxiv preprint supplement (doi:10.1101/598110), 2019-09-21
Supplement: Supplementary file [file media-1.pdf]

# **A resource-efficient tool for mixed model association analysis of large-scale data**

Jiang *et al.*

**Supplementary Note 1-6**

**Supplementary Tables 1-4**

**Supplementary Figures 1-14**

**Supplementary References**

## Supplementary Notes

### Supplementary Note 1. Strategies to simulate SNP genotypes from existing GWAS data

To generate a cohort with relatedness and substantial population stratification, we sampled segments of SNP genotypes from existing GWAS data based on a mosaic simulation scheme modified from Ref. <sup>1</sup>. Detailed procedures have been listed below (see **Supplementary Figure 3** for a schematic diagram):

- 1) Randomly selecting two groups of individuals with different ancestry backgrounds from the UKB participants. Based on the self-reported ethnic background, we first extracted all the UKB participants reported as “British” and “Irish” (see Data Field 21000 of UKB at <http://biobank.ctsu.ox.ac.uk/crystal/field.cgi?id=21000>). However, the self-reported ancestry may not be accurate, as we observed inconsistency between one’s belief and his/her actual genetic background estimated from genotype data (**Supplementary Figure 1**). Thus, we selected 9,000 unrelated self-reported “British” and 9,000 unrelated “Irish” participants with relatively large differences in the first two PCs (**Supplementary Figure 2**) to ensure sufficient genetic separation between the two groups. These individuals were the “ancestors” (or founders) of our simulated individuals in step 2.
- 2) Generating genotypes of 90,000 unrelated individuals (i.e., 45,000 unrelated “British” and 45,000 unrelated “Irish”). To generate 45,000 unrelated “British” individuals, we first divided the genomes (536,684 SNPs in total) of all 9,000 “British” ancestors into 269 consecutive segments of approximately 2,000 SNPs. Then, to simulate the genotype of one individual, 100 ancestors were randomly sampled from the 9,000 “British” ancestors. Next, we randomly selected each segment from one of the 100 ancestors, and aligned all the 269 sampled segments back together to form a new complete genome. This would be one simulated “British” individual. By repeating these steps, 45,000 unrelated “British” individuals were generated. We used the same strategy to generate 45,000 unrelated “Irish” individuals by sampling the segments from the “Irish” ancestors.
- 3) Generating genotypes of 10,000 related individuals (i.e., 5,000 related “British” and 5,000 related “Irish”). A similar scheme as in step 2) was applied to generate related individuals. We define “related individuals” as those who are related with at least one other individual in the sample with genetic relatedness  $\geq 0.05$ . Two individuals, as one related pair, were generated simultaneously each time. To mimic different degrees of relatedness, the segments for each pair of 1<sup>st</sup> degree of relatives were randomly sampled from 2 “common ancestors”, and the segments for each pair of 2<sup>nd</sup> degree of relatives were randomly sampled from 4 “common ancestors”. Instead of using the original 18,000 ancestors from step 1), we generated an independent set of additional 10,000 “British” individuals and 10,000 “Irish”

individuals as the ancestors for these related individuals. A total of 2,500 pairs of 1<sup>st</sup> degree of relatives (genetic relatedness =  $\sim 0.5$ ; 1,250 "British" pairs and 1,250 "Irish" pairs) and 2,500 pairs of 2<sup>nd</sup> degree of relatives (genetic relatedness =  $\sim 0.25$ ; 1,250 "British" pairs and 1,250 "Irish" pairs) were eventually simulated.

In summary, we generated genotype data of two groups of individuals with reasonably large difference in genetic ancestry between the two groups and substantial proportion of closely related individuals within each group. The difference in ancestry allowed us to simulate the effect of population stratification and the related individuals allowed us to simulate shared environmental effects.

## Supplementary Note 2. Strategies for simulating phenotype

We used a set of different parameters to simulate phenotypes based on the simulated genotype and the following model:

$$\mathbf{y} = \mathbf{g} + \mathbf{z}b_p + \mathbf{e}_c + \mathbf{e}$$

- 1)  $\mathbf{g} = \sum_{i=1}^m \mathbf{x}_i b_i$  where  $\mathbf{x}_i$  is a vector of genotypes of the  $i^{\text{th}}$  causal SNP across all individuals with its effect  $b_i$  generated from a standard normal distribution  $N(0, 1)$ . The number of causal variants ( $m$ ) was set to 10,000 to mimic a polygenic trait, all of which were randomly sampled from SNPs on the odd chromosomes (leaving the SNPs on the even chromosomes to quantify the inflation in test-statistics under the null). We also tested the methods with more causal SNPs, i.e., 20,000, 40,000, or 80,000.
- 2)  $\mathbf{z}$  is an indicator vector consists of 0 (indicating “British”) and 1 (indicating “Irish”) with  $b_p$  being the mean difference in phenotype between the two groups. The value of  $b_p$  does not matter as  $\mathbf{z}b_p$  is standardised in the final step, and any positive value of  $b$  yields the same result. The purpose of this step is to simulate population stratification effect by creating a phenotypic mean difference between the two ancestry groups.
- 3)  $\mathbf{e}_c$  is a vector of shared environmental effects generated by: a) identifying “close relatives” (including the simulated first- and second-degree relatives as well as those pairs with estimated genetic relatedness  $> 0.05$ ; **Supplementary Note 1**) and grouping them into “families” and extended “families”; b) randomly sampling an effect from a normal distribution to all the individuals in each family.
- 4)  $\mathbf{e}$  is a vector of residual effects, randomly generated from a normal distribution  $\mathbf{e} \sim N(0, 1)$ .

The phenotypic value for each sample was a weighted sum of all the standardised components above. The phenotypic variance ( $V_p$ ) was set to 1. The weights were the square root of the variance proportion of each component, determined by the following: a) genetic variance:  $V_g = 0.4 \times V_p$ ; b) variance due to population stratification:  $V_{pop} = 0.05 \times V_p$ ; c) variance due to common environmental effects:  $V_{related} = 0.1 \text{ or } 0.2 \times V_p$  (for related individuals); and d) residual variance:  $V_{residual} = V_p - V_g - V_{pop} - V_{related}$ .

### **Supplementary Note 3. Constructing relatedness matrix from pedigree data and sparse GRM from SNP data**

If pedigree information is available, we can perform a fastGWA-Ped analysis with a relatedness matrix constructed from the expected relatedness coefficients (e.g., 0.5, 0.25, 0.125 and 0.0675 for the first-, second-, third- and fourth-degree relatives, respectively and 1 for monozygotic twins), similar to the traditional family-based MLMs<sup>2-5</sup>. We have provided an R-script (see **URLs**) to construct FAM based on unknown relatedness information (e.g., the inferred relatedness information provided by the UKB). Note that for fastGWA-Ped, to avoid singularity of matrix **V** for traits for which the estimate of residual variance component was negative or close to zero (e.g., < 10% of the phenotypic variance), the non-zero elements in matrix  **$\pi$**  (**Equation 1**) can be recomputed from SNP data with minimal computing cost.

If the pedigree information is incomplete or is not available, the relatedness matrix can be replaced by a sparse GRM. Constructing a GRM could be time-consuming with a runtime of  $O(MN^2/2)$  especially when the sample size is large. We have provided a new tool in GCTA to compute a GRM in a very efficient manner via bitwise operations (**URLs**). We have also provided a shell script in the GCTA website (**URLs**) to divide the whole computation process into a number of computing jobs to be parallelized in a high-performance computing system.

In the fastGWA analysis of the UKB data, we computed the GRM for 456,422 individuals of European ancestry using 565,631 slightly LD-pruned HapMap3<sup>6</sup> SNPs (LD-pruning parameters used in PLINK: window size = 1000kb, step size = 100,  $r^2 = 0.9$  and  $MAF \geq 0.01$ ). Note that this set SNPs are sufficient to capture the relatedness among close relatives (e.g., those with genetic relatedness > 0.05). In the fastGWA-ped analysis, we inferred the pedigree relationships based on the KING<sup>7,8</sup> relatedness estimates provided by the UKB. The runtime to build a GRM for the full UKB cohort was around 7 hours with 100 jobs (each job was assigned with 13 GB memory and 6 CPUs). We also have an efficient tool in GCTA to convert a full-dense GRM to a sparse GRM given a relatedness threshold (default value = 0.05) and the computing cost of this conversion is low even for large data set like the UKB. Note that the same set of SNPs were used in the BOLT-REML and GCTA-GREML analyses to estimate the “genetic variance” and/or variance due to common environmental effect (see **Discussion** and **Supplementary Figure 9**).

We noticed that there were some discrepancies between the pedigree relatedness inferred from relatedness estimates provided by the UKB and our sparse GRM (**Supplementary Figure 11**). This is mainly because we used GRM to pick up more distant related pairs with relatedness coefficients between 0.05 to 0.125. In contrast, the relatedness estimates from the UKB were

evaluated according to a more sophisticated strategy (e.g. using a different set of markers with  $m = 93,511$  and excluding a small proportion of individuals with higher missingness rates) <sup>8</sup>. The number of related pairs provided by the UKB was 107,162 (no further than third-degree relatives) involving 147,731 unique individuals, while the number of related pairs based on our sparse GRM (estimated from 565,631 common HapMap3 SNPs) was 178,075 with 213,620 unique individuals. These two relatedness estimates were used for two different primary purposes: the UKB estimate was primarily used to make explicit inference about the family relatedness among samples, while our estimate was used to capture the relatedness between all close and distant relatives with the primary aim to control for the confounding in association test.

#### **Supplementary Note 4. Principal component analysis**

We compared three different principal component analysis (PCA) methods using our simulated genotype data, namely flashPCA2 (or pruned PCA, with a recommended pruning step and a projection step, see [URL](#) and Ref. <sup>9</sup>), exact PCA (implemented in GCTA using all the SNPs without pruning, see Ref. <sup>10</sup>), and projection PCA (proj. PCA, implemented in GCTA). The proj. PCA method can be described as: 1) randomly extracting 10,000 individuals from the sample ( $n = 100,000$ ); 2) performing exact PCA using the subset of individuals and estimating the loadings of each SNP to the top PCs; and 3) computing the top PCs of the whole sample based on the SNP loadings estimated from the subset.

The first and second PCs calculated from flashPCA2, as well as those from exact PCA, were plotted in **Supplementary Figure 4**. Apart from the scale difference, both methods managed to separate the individuals into two groups based on the first two PCs. We then examined the proportion of explained phenotypic variance ( $V_{phenotype}$ ) by the top PCs. There was no significant difference among all three methods (**Supplementary Figure 14**), as all of them accounted for approximately 5% of  $V_{phenotype}$ , consistent with the parameter used to simulate data. However, fitting PCs calculated from all the SNPs (by exact PCA) would lead to slight deflation of test statistics (**Supplementary Figure 12**). This is because each PC is essentially a feature extracted from the SNPs, and fitting PCs as covariates while testing a target SNP is equivalent to fitting the target SNP more than once in the model, leading to deflated test-statistics under the null. If PCs are computed using a set of LD-pruned SNPs with a relatively stringent threshold, the target SNP is much less likely to be included in computing the PCs. In this case, the test statistics are less likely to be deflated under the null (**Figure 1a**). We therefore adjusted the phenotypes by the top 10 PCs from flashPCA2 (76,103 LD-pruned SNPs with window size = 1 Mb, step size = 50 SNPs, and LD  $r^2$  threshold = 0.05 as recommended by flashPCA2) in all the subsequent association tests in the simulation study. The number of PCs used is justified by the result that the top 10 PCs were sufficient to capture the majority of phenotype variation due to population stratification (**Supplementary Figure 14**).

In real data analysis, we adjusted each of the 3,613 UKB traits by the top 20 PCs which had been computed by fastPCA <sup>11</sup> using a similar strategy as flashPCA2, as described in Ref. <sup>8</sup>.

### **Supplementary Note 5. LD score for simulated genotype data**

LD score of a SNP is defined as the sum of LD  $r^2$  between the target SNP and all the other SNPs in a genomic region adjusting for chance correlations <sup>12</sup>. LD scores are required for both BOLT-LMM and LD score regression (LDSC) analyses. In real data analysis, we used LD scores provided by BOLT-LMM and LDSC software tools (computed from SNP data of individuals of European ancestry in the 1000 Genomes Project <sup>13</sup>; see **URLs**). In the simulation study, we computed LD scores from the simulated genotypes using GCTA <sup>14</sup> (window size = 10 Mb).



### **Supplementary Note 6. Acknowledgements**

**UKB:** This study has been conducted using UK Biobank resource under Application Number 12514. UK Biobank was established by the Wellcome Trust medical charity, Medical Research Council, Department of Health, Scottish Government and the Northwest Regional Development Agency. It has also had funding from the Welsh Assembly Government, British Heart Foundation and Diabetes UK.

## Supplementary Tables

**Supplementary Table 1.** Abbreviated names of the 24 UKB quantitative traits. The first column is the abbreviation, the second column is the data-field ID of each trait, the third column is the number of records available for analysis, the fourth column is the type of phenotype data (integer or continuous variable), the fifth column contains the full names of these phenotypes, and the last column indicates which traits are female-specific.

| Trait Abbr. | Data-field | Count   | Type       | Description                                        | Note                    |
|-------------|------------|---------|------------|----------------------------------------------------|-------------------------|
| WC          | 48         | 500,376 | Continuous | Waist circumference                                |                         |
| HC          | 49         | 500,317 | Continuous | Hip circumference                                  |                         |
| HT          | 50         | 499,997 | Continuous | Standing height                                    |                         |
| WT          | 21002      | 499,762 | Continuous | Weight                                             |                         |
| BMI         | 21001      | 499,431 | Continuous | Body mass index                                    |                         |
| HGSR        | 47         | 499,193 | Integer    | Hand grip strength (right)                         |                         |
| HGSL        | 46         | 499,126 | Integer    | Hand grip strength (left)                          |                         |
| MTCIM       | 20023      | 496,709 | Integer    | Mean time to correctly identify matches            |                         |
| BMR         | 23105      | 492,388 | Continuous | Basal metabolic rate                               |                         |
| BFP         | 23099      | 492,127 | Continuous | Body fat percentage                                |                         |
| DBP         | 4079       | 472,416 | Integer    | Diastolic blood pressure, automated reading        |                         |
| SBP         | 4080       | 472,411 | Integer    | Systolic blood pressure, automated reading         |                         |
| FVC         | 3062       | 453,724 | Continuous | Forced vital capacity                              |                         |
| FEV         | 3063       | 453,724 | Continuous | Forced expiratory volume in 1-second               |                         |
| PEF         | 3064       | 453,724 | Integer    | Peak expiratory flow                               |                         |
| NTS         | 20127      | 401,596 | Integer    | Neuroticism score                                  |                         |
| EA          | 845        | 336,769 | Integer    | Age completed full time education                  |                         |
| hBMD        | 78         | 279,104 | Continuous | Heel bone mineral density (BMD) T-score, automated |                         |
| BW          | 20022      | 277,009 | Continuous | Birth weight                                       |                         |
| AMena       | 2714       | 272,927 | Integer    | Age at menarche                                    | Female-specific factors |
| AFLB        | 2754       | 184,987 | Integer    | Age at first live birth                            | Female-specific factors |
| PR          | 4194       | 170,759 | Integer    | Pulse rate                                         |                         |
| FIS         | 20016      | 165,471 | Integer    | Fluid intelligence score                           |                         |
| AMeno       | 3581       | 165,363 | Integer    | Age at menopause (last menstrual period)           | Female-specific factors |

**Supplementary Table 2.** Estimated attenuation ratio (SE) from LD score regression analysis for the 24 UKB traits. Phenotypes are ordered by descending sample size ( $n$ ). The GWAS summary statistics are from fastGWA analyses in this study, the Neale Lab and GeneATLAS, respectively. “\” represents that the trait is not available in GeneATLAS. The abbreviated and full names of the traits are listed in **Supplementary Table 1**.

| Trait | Attenuation ratio (fastGWA) | $n$ (fastGWA) | Attenuation ratio (Neale Lab) | $n$ (Neale Lab) | Attenuation ratio (GeneATLAS) |
|-------|-----------------------------|---------------|-------------------------------|-----------------|-------------------------------|
| WC    | 0.0712 (0.0088)             | 455,545       | 0.0712 (0.0104)               | 360,564         | 0.0707 (0.008)                |
| HC    | 0.0865 (0.0087)             | 455,495       | 0.0865 (0.0098)               | 360,521         | 0.0867 (0.0079)               |
| HT    | 0.1382 (0.0095)             | 455,332       | 0.1206 (0.0089)               | 360,388         | 0.112 (0.0068)                |
| WT    | 0.0859 (0.0081)             | 455,010       | 0.0838 (0.0091)               | 360,116         | 0.0845 (0.0075)               |
| BMI   | 0.0705 (0.0076)             | 454,841       | 0.0715 (0.0086)               | 359,983         | 0.0683 (0.0072)               |
| HGSR  | 0.0737 (0.0108)             | 454,473       | 0.0777 (0.0127)               | 359,729         | 0.0658 (0.0096)               |
| HGSL  | 0.0672 (0.0111)             | 454,417       | 0.0672 (0.0125)               | 359,704         | 0.0602 (0.0102)               |
| MTCIM | 0.0528 (0.0138)             | 453,043       | 0.052 (0.0163)                | 358,695         | 0.0472 (0.0154)               |
| BMR   | 0.103 (0.0087)              | 448,348       | 0.1001 (0.0093)               | 354,825         | 0.0971 (0.0079)               |
| BFP   | 0.0807 (0.0082)             | 448,114       | 0.0791 (0.0093)               | 354,628         | 0.0836 (0.0076)               |
| DBP   | 0.0884 (0.0114)             | 430,029       | 0.0836 (0.0129)               | 340,162         | \                             |
| SBP   | 0.0896 (0.0102)             | 430,025       | 0.0828 (0.012)                | 340,159         | \                             |
| FVC   | 0.1135 (0.0098)             | 415,931       | 0.1055 (0.0104)               | 329,404         | \                             |
| FEV   | 0.0981 (0.0097)             | 415,931       | 0.0891 (0.0101)               | 329,404         | \                             |
| PEF   | 0.0878 (0.0135)             | 415,931       | 0.0852 (0.0155)               | 329,404         | \                             |
| NTS   | 0.0433 (0.0128)             | 369,407       | 0.0443 (0.0155)               | 293,006         | \                             |
| EA    | 0.0908 (0.0156)             | 304,998       | 0.084 (0.0171)                | 240,547         | \                             |
| hBMD  | 0.128 (0.0125)              | 262,294       | 0.1147 (0.0119)               | 206,589         | \                             |
| BW    | 0.1084 (0.0229)             | 258,857       | 0.1113 (0.0244)               | 205,475         | \                             |
| AMena | 0.0337 (0.011)              | 240,378       | 0.038 (0.0119)                | 188,644         | \                             |
| AFLB  | 0.0691 (0.0172)             | 168,097       | 0.0733 (0.0186)               | 131,987         | \                             |
| PR    | 0.074 (0.0242)              | 149,082       | 0.0687 (0.0284)               | 118,850         | \                             |
| FIS   | 0.052 (0.015)               | 146,808       | 0.058 (0.018)                 | 117,131         | \                             |
| AMeno | 0.0376 (0.0329)             | 141,926       | 0.0321 (0.0366)               | 111,593         | \                             |

**Supplementary Table 3.** Number of exome-wide significant associations from the fastGWA analysis of the WES data for 24 traits in the UKB. Phenotypes are ordered by descending sample size ( $n$ ). The abbreviated and full names of the traits are listed in **Supplementary Table 1**. Clumping analysis criteria:  $P$ -value threshold =  $0.05/\text{the number of tested variants}$ , window size = 5 Mb, and LD  $r^2$  threshold = 0.01. LR: linear regression (if the estimated genetic variance component is not nominally significant). Conditional fastGWA analysis: fastGWA analysis of a WES variant conditioning on the GWAS signals (with 10 Mb of the WES variant) identified from the imputed data.

| Trait        | $n$   | Method | fastGWA analysis | Conditional fastGWA analysis |
|--------------|-------|--------|------------------|------------------------------|
| WC           | 46135 | MLM    | 0                | \                            |
| HC           | 46133 | MLM    | 2                | 0                            |
| HT           | 46116 | MLM    | 0                | \                            |
| WT           | 46067 | MLM    | 5                | 0                            |
| BMI          | 46051 | MLM    | 66               | 0                            |
| MTCIM        | 46025 | MLM    | 12               | 0                            |
| HGSL         | 45973 | MLM    | 8                | 0                            |
| HGSR         | 45949 | MLM    | 0                | \                            |
| DBP          | 45660 | MLM    | 2                | 0                            |
| SBP          | 45659 | MLM    | 4                | 0                            |
| BMR          | 45172 | MLM    | 19               | 0                            |
| BFP          | 45143 | MLM    | 3                | 0                            |
| FEV          | 41430 | MLM    | 6                | 1                            |
| FVC          | 41430 | MLM    | 8                | 1                            |
| PEF          | 41430 | MLM    | 1                | 0                            |
| NTS          | 38071 | MLM    | 0                | \                            |
| FIS          | 37351 | MLM    | 7                | 2                            |
| PR           | 37166 | MLM    | 6                | 2                            |
| EA           | 29619 | MLM    | 0                | \                            |
| BW           | 27450 | MLM    | 0                | \                            |
| AMena        | 24450 | MLM    | 0                | \                            |
| AFLB         | 16703 | MLM    | 0                | \                            |
| AMeno        | 14088 | LR     | 8                | 1                            |
| hBMD         | 7066  | MLM    | 1                | 0                            |
| <b>Total</b> | \     | \      | <b>158</b>       | <b>7</b>                     |

**Supplementary Table 4.** Summary statistics of the exome-wide significant loci from the fastGWAS analysis of the UKB WES data ( $n = 46,191$ ) for the 24 traits. PLINK clumping criteria:  $P$ -value threshold = 0.05/the number of variants tested for a trait, window size = 5 Mb, and LD  $r^2$  threshold = 0.01. Each variant is named in a format “Chromosome:Position:Allele 1:Allele 2” based on the Genome Reference Consortium Human Build 38. “EA” = effect allele; “Freq.” = frequency of the effect allele;  $n$  = sample size; “beta” = estimated of variant effect; “se” = standard error of the estimated variant effect;  $p$  =  $p$ -value. Shown are also the WES GWAS summary statistics from the fastGWA analysis conditioning on GWAS signals (within 10Mb of the WES variant in either direction) identified from the analysis of the whole UKB imputed data ( $n = 456,422$ ).

| Trait | Variant         | EA | Freq. | $n$   | fastGWA |        |          | Conditional fastGWA analysis |        |          |
|-------|-----------------|----|-------|-------|---------|--------|----------|------------------------------|--------|----------|
|       |                 |    |       |       | beta    | se     | p        | beta                         | se     | p        |
| AMeno | 20:5967581:G:A  | A  | 0.061 | 14088 | 0.232   | 0.0238 | 1.47E-22 | 0.152                        | 0.0244 | 4.42E-10 |
| AMeno | 19:55319820:A:G | G  | 0.391 | 14088 | -0.084  | 0.0118 | 8.53E-13 | -0.046                       | 0.0120 | 0.0001   |
| AMeno | 1:38874610:C:T  | T  | 0.464 | 14088 | -0.063  | 0.0115 | 3.54E-08 | -0.025                       | 0.0116 | 0.030    |
| AMeno | 8:38030499:C:G  | C  | 0.225 | 14087 | 0.084   | 0.0136 | 6.66E-10 | 0.022                        | 0.0141 | 0.111    |
| AMeno | 4:83472322:C:T  | C  | 0.482 | 13674 | 0.062   | 0.0113 | 4.29E-08 | -0.012                       | 0.0114 | 0.311    |
| AMeno | 16:11898087:C:T | T  | 0.316 | 13652 | 0.063   | 0.0120 | 1.85E-07 | 0.006                        | 0.0121 | 0.591    |
| AMeno | 6:10887043:C:G  | C  | 0.174 | 14088 | 0.078   | 0.0150 | 1.80E-07 | 0.002                        | 0.0156 | 0.911    |
| AMeno | 12:66310445:A:G | G  | 0.031 | 14088 | 0.214   | 0.0331 | 8.82E-11 | 0.002                        | 0.0333 | 0.960    |
| BFP   | 20:63738996:T:C | T  | 0.330 | 43216 | -0.028  | 0.0052 | 1.14E-07 | -0.003                       | 0.0053 | 0.609    |
| BFP   | 2:24918669:A:G  | G  | 0.484 | 45143 | 0.027   | 0.0050 | 5.69E-08 | -0.001                       | 0.0051 | 0.843    |
| BFP   | 11:27700751:G:T | T  | 0.319 | 45143 | 0.028   | 0.0054 | 2.84E-07 | -0.0006                      | 0.0054 | 0.910    |
| BMI   | 11:27700751:G:T | T  | 0.319 | 46051 | 0.038   | 0.0069 | 5.26E-08 | 0.024                        | 0.0070 | 0.0005   |
| BMI   | 1:177929986:G:C | C  | 0.206 | 46031 | 0.047   | 0.0080 | 6.42E-09 | 0.018                        | 0.0081 | 0.029    |
| BMI   | 2:24918669:A:G  | G  | 0.484 | 46051 | 0.039   | 0.0065 | 2.50E-09 | 0.009                        | 0.0066 | 0.163    |
| BMI   | 3:49860567:A:G  | A  | 0.490 | 46051 | -0.033  | 0.0065 | 2.60E-07 | 0.001                        | 0.0067 | 0.835    |
| BMI   | 15:67824962:T:A | A  | 0.225 | 46051 | -0.041  | 0.0077 | 9.29E-08 | 0.001                        | 0.0080 | 0.914    |
| BMI   | 18:60372043:C:T | T  | 0.021 | 46051 | -0.121  | 0.0229 | 1.24E-07 | -0.002                       | 0.0237 | 0.929    |

|     |                  |   |       |       |        |        |          |           |        |          |
|-----|------------------|---|-------|-------|--------|--------|----------|-----------|--------|----------|
| BMI | 4:25407216:G:A   | A | 0.233 | 46043 | -0.046 | 0.0077 | 2.09E-09 | 0.0003    | 0.0078 | 0.969    |
| BMI | 19:45678134:G:C  | C | 0.194 | 46051 | -0.044 | 0.0082 | 6.26E-08 | -3.71E-05 | 0.0083 | 0.996    |
| BMR | 3:129252270:T:C  | C | 0.088 | 45026 | 0.041  | 0.0074 | 4.11E-08 | 0.036     | 0.0075 | 1.24E-06 |
| BMR | 20:35437976:G:A  | G | 0.407 | 45172 | 0.038  | 0.0043 | 4.91E-19 | 0.021     | 0.0045 | 3.03E-06 |
| BMR | 4:145159425:D:1  | A | 0.359 | 45089 | 0.025  | 0.0044 | 1.69E-08 | 0.015     | 0.0045 | 0.0009   |
| BMR | 2:23703363:C:T   | T | 0.130 | 45171 | -0.037 | 0.0063 | 6.34E-09 | -0.015    | 0.0064 | 0.020    |
| BMR | 16:30010081:C:T  | T | 0.394 | 45172 | 0.027  | 0.0043 | 9.01E-10 | 0.009     | 0.0044 | 0.054    |
| BMR | 4:17845658:A:C   | C | 0.105 | 43582 | -0.038 | 0.0068 | 1.46E-08 | -0.011    | 0.0068 | 0.115    |
| BMR | 2:36581207:C:T   | T | 0.349 | 44059 | 0.023  | 0.0044 | 2.90E-07 | 0.007     | 0.0045 | 0.145    |
| BMR | 6:130060101:T:C  | T | 0.312 | 45168 | 0.029  | 0.0046 | 1.31E-10 | 0.006     | 0.0047 | 0.197    |
| BMR | 20:33745375:G:T  | T | 0.252 | 44799 | -0.027 | 0.0049 | 4.73E-08 | -0.006    | 0.0051 | 0.207    |
| BMR | 7:92618019:A:G   | G | 0.250 | 45166 | 0.027  | 0.0049 | 3.42E-08 | 0.005     | 0.0050 | 0.295    |
| BMR | 9:108897159:T:C  | C | 0.049 | 45172 | 0.056  | 0.0098 | 1.04E-08 | 0.009     | 0.0105 | 0.373    |
| BMR | 1:177929986:G:C  | C | 0.206 | 45152 | 0.031  | 0.0053 | 3.04E-09 | 0.004     | 0.0056 | 0.431    |
| BMR | 1:155041950:G:A  | A | 0.202 | 45159 | 0.028  | 0.0053 | 7.15E-08 | 0.003     | 0.0054 | 0.550    |
| BMR | 12:882140:G:A    | A | 0.199 | 44544 | 0.030  | 0.0053 | 1.56E-08 | 0.002     | 0.0056 | 0.684    |
| BMR | 16:2105296:A:G   | G | 0.169 | 45172 | -0.030 | 0.0057 | 1.84E-07 | -0.002    | 0.0059 | 0.785    |
| BMR | 17:63930138:A:G  | A | 0.354 | 45172 | -0.025 | 0.0044 | 1.61E-08 | 0.001     | 0.0047 | 0.829    |
| BMR | 6:7727038:G:A    | A | 0.467 | 45172 | 0.024  | 0.0043 | 2.29E-08 | 0.0004    | 0.0045 | 0.934    |
| BMR | 17:30899634:A:G  | G | 0.379 | 44776 | -0.027 | 0.0044 | 6.61E-10 | 6.73E-05  | 0.0044 | 0.988    |
| BMR | 8:134600502:A:G  | G | 0.407 | 45172 | -0.023 | 0.0043 | 9.34E-08 | 5.16E-05  | 0.0046 | 0.991    |
| DBP | 6:28153120:G:A   | A | 0.243 | 45660 | -0.043 | 0.0074 | 5.00E-09 | -0.020    | 0.0075 | 0.008    |
| DBP | 12:111446804:T:C | T | 0.482 | 45660 | 0.047  | 0.0064 | 1.89E-13 | 0.017     | 0.0067 | 0.012    |
| FEV | 5:140671341:G:A  | A | 0.173 | 41430 | -0.041 | 0.0072 | 1.39E-08 | -0.042    | 0.0074 | 1.23E-08 |
| FEV | 4:145159425:D:1  | A | 0.359 | 41351 | 0.026  | 0.0050 | 1.89E-07 | 0.015     | 0.0052 | 0.004    |
| FEV | 6:32058330:C:T   | C | 0.293 | 41430 | 0.040  | 0.0053 | 2.82E-14 | 0.013     | 0.0054 | 0.019    |
| FEV | 4:105897896:G:A  | A | 0.257 | 41427 | -0.035 | 0.0055 | 2.36E-10 | -0.013    | 0.0056 | 0.023    |

|      |                  |     |       |       |        |        |          |        |        |          |
|------|------------------|-----|-------|-------|--------|--------|----------|--------|--------|----------|
| FEV  | 17:46038946:T:C  | C   | 0.219 | 40751 | -0.035 | 0.0058 | 1.15E-09 | -0.009 | 0.0059 | 0.118    |
| FEV  | 6:35424010:C:T   | C   | 0.228 | 41430 | -0.031 | 0.0058 | 1.12E-07 | -0.003 | 0.0060 | 0.632    |
| FEV  | 19:8605262:C:T   | T   | 0.037 | 41430 | -0.073 | 0.0130 | 2.07E-08 | -0.006 | 0.0144 | 0.677    |
| FEV  | 15:83899752:A:G  | A   | 0.475 | 41429 | -0.026 | 0.0048 | 6.47E-08 | -0.001 | 0.0049 | 0.884    |
| FIS  | 1:43569801:G:A   | A   | 0.375 | 37351 | 0.041  | 0.0072 | 8.80E-09 | 0.037  | 0.0072 | 3.61E-07 |
| FIS  | 10:102231624:G:A | G   | 0.377 | 37351 | 0.037  | 0.0072 | 3.28E-07 | 0.025  | 0.0072 | 0.0004   |
| FIS  | 6:30064745:A:C   | C   | 0.131 | 37320 | 0.064  | 0.0103 | 5.51E-10 | 0.022  | 0.0103 | 0.030    |
| FIS  | 14:32823916:A:G  | A   | 0.463 | 37351 | -0.037 | 0.0070 | 1.60E-07 | -0.009 | 0.0070 | 0.205    |
| FIS  | 3:49805448:I:1   | TG  | 0.500 | 37351 | -0.041 | 0.0070 | 6.55E-09 | -0.001 | 0.0070 | 0.895    |
| FIS  | 11:64242407:G:A  | A   | 0.083 | 37351 | -0.065 | 0.0126 | 2.67E-07 | \      | \      | \        |
| FIS  | 12:132490757:A:G | A   | 0.130 | 37348 | 0.066  | 0.0112 | 3.39E-09 | \      | \      | \        |
| FVC  | 5:140671322:C:T  | T   | 0.173 | 41430 | -0.041 | 0.0069 | 2.75E-09 | -0.043 | 0.0070 | 8.79E-10 |
| FVC  | 2:55922340:C:G   | G   | 0.192 | 41423 | -0.032 | 0.0059 | 3.78E-08 | -0.021 | 0.0061 | 0.0005   |
| FVC  | 17:46038946:T:C  | C   | 0.219 | 40751 | -0.038 | 0.0056 | 1.88E-11 | -0.014 | 0.0058 | 0.017    |
| FVC  | 6:32184217:A:T   | A   | 0.144 | 41430 | 0.053  | 0.0066 | 1.92E-15 | 0.010  | 0.0070 | 0.167    |
| FVC  | 15:100152748:G:A | A   | 0.110 | 41430 | -0.039 | 0.0074 | 1.51E-07 | -0.001 | 0.0075 | 0.910    |
| FVC  | 19:8605262:C:T   | T   | 0.037 | 41430 | -0.081 | 0.0125 | 7.10E-11 | -0.001 | 0.0136 | 0.965    |
| hBMD | 7:121329915:I:2  | GCT | 0.259 | 7029  | 0.159  | 0.0183 | 2.66E-18 | 0.088  | 0.0201 | 1.08E-05 |
| HC   | 16:284580:G:C    | C   | 0.284 | 46133 | -0.038 | 0.0073 | 2.54E-07 | -0.018 | 0.0075 | 0.018    |
| HC   | 12:882140:G:A    | A   | 0.199 | 45491 | 0.042  | 0.0082 | 2.79E-07 | 0.002  | 0.0083 | 0.842    |
| HC   | 15:67824962:T:A  | A   | 0.225 | 46133 | -0.045 | 0.0079 | 8.28E-09 | 0.002  | 0.0079 | 0.844    |
| HC   | 16:31110472:G:A  | A   | 0.359 | 46133 | -0.035 | 0.0068 | 3.10E-07 | -0.001 | 0.0070 | 0.902    |
| HC   | 20:35437976:G:A  | G   | 0.407 | 46133 | 0.038  | 0.0067 | 1.08E-08 | -0.001 | 0.0067 | 0.938    |
| HGSR | 17:63842363:A:G  | G   | 0.331 | 45949 | -0.026 | 0.0048 | 4.67E-08 | -0.018 | 0.0048 | 0.0002   |
| HGSR | 6:32642624:G:A   | A   | 0.191 | 45798 | -0.030 | 0.0056 | 8.87E-08 | -0.014 | 0.0056 | 0.015    |
| HT   | 7:2762888:T:C    | C   | 0.301 | 46116 | -0.039 | 0.0049 | 3.71E-15 | -0.025 | 0.0052 | 1.30E-06 |
| HT   | 15:100152748:G:A | A   | 0.110 | 46116 | -0.058 | 0.0072 | 5.66E-16 | -0.040 | 0.0084 | 2.23E-06 |

|    |                  |   |       |       |        |        |          |        |        |          |
|----|------------------|---|-------|-------|--------|--------|----------|--------|--------|----------|
| HT | 6:26183874:G:A   | A | 0.258 | 46116 | -0.044 | 0.0052 | 2.77E-17 | -0.026 | 0.0058 | 7.78E-06 |
| HT | 5:32711527:C:A   | A | 0.195 | 46109 | -0.034 | 0.0057 | 1.92E-09 | -0.027 | 0.0063 | 1.27E-05 |
| HT | 20:35437976:G:A  | G | 0.407 | 46116 | 0.059  | 0.0046 | 9.29E-38 | 0.021  | 0.0054 | 9.84E-05 |
| HT | 7:92618019:A:G   | G | 0.250 | 46110 | 0.047  | 0.0052 | 3.20E-19 | 0.021  | 0.0056 | 0.0002   |
| HT | 8:134637605:G:A  | A | 0.259 | 46116 | -0.029 | 0.0052 | 2.41E-08 | -0.021 | 0.0057 | 0.0002   |
| HT | 10:77830146:C:T  | T | 0.338 | 46116 | -0.026 | 0.0048 | 3.84E-08 | -0.018 | 0.0051 | 0.0005   |
| HT | 22:45327973:C:G  | C | 0.381 | 46116 | 0.024  | 0.0047 | 1.83E-07 | 0.017  | 0.0051 | 0.0006   |
| HT | 2:219309183:C:T  | T | 0.117 | 46082 | -0.035 | 0.0068 | 2.71E-07 | -0.027 | 0.0077 | 0.001    |
| HT | 5:177089630:G:A  | A | 0.242 | 46116 | 0.042  | 0.0053 | 2.52E-15 | 0.020  | 0.0060 | 0.001    |
| HT | 18:23135692:G:A  | A | 0.495 | 46114 | 0.031  | 0.0045 | 7.07E-12 | 0.016  | 0.0047 | 0.001    |
| HT | 5:132336076:T:C  | T | 0.295 | 45734 | -0.026 | 0.0049 | 1.47E-07 | -0.017 | 0.0055 | 0.002    |
| HT | 4:144658755:G:A  | A | 0.484 | 45962 | 0.029  | 0.0045 | 2.40E-10 | 0.014  | 0.0048 | 0.003    |
| HT | 3:141608632:G:A  | A | 0.395 | 46116 | 0.033  | 0.0046 | 7.02E-13 | 0.015  | 0.0051 | 0.003    |
| HT | 1:41152770:A:T   | A | 0.219 | 46114 | 0.035  | 0.0055 | 2.44E-10 | 0.017  | 0.0060 | 0.004    |
| HT | 6:130060101:T:C  | T | 0.311 | 46112 | 0.035  | 0.0049 | 1.72E-12 | 0.015  | 0.0053 | 0.004    |
| HT | 12:28484182:G:A  | A | 0.316 | 45993 | -0.035 | 0.0049 | 3.55E-13 | -0.015 | 0.0053 | 0.005    |
| HT | 6:31627710:A:G   | G | 0.365 | 46101 | -0.035 | 0.0047 | 1.39E-13 | -0.015 | 0.0053 | 0.006    |
| HT | 9:95447312:G:A   | A | 0.338 | 46116 | -0.031 | 0.0048 | 1.94E-10 | -0.015 | 0.0056 | 0.009    |
| HT | 10:103076290:T:C | C | 0.389 | 46116 | 0.024  | 0.0047 | 2.84E-07 | 0.013  | 0.0049 | 0.009    |
| HT | 15:83913152:T:C  | T | 0.476 | 46116 | -0.036 | 0.0045 | 1.02E-15 | -0.013 | 0.0051 | 0.009    |
| HT | 5:108820558:T:A  | A | 0.228 | 46116 | 0.029  | 0.0054 | 5.13E-08 | 0.014  | 0.0054 | 0.011    |
| HT | 17:7508451:C:T   | T | 0.216 | 46116 | 0.031  | 0.0055 | 1.17E-08 | 0.014  | 0.0058 | 0.016    |
| HT | 2:232210371:C:T  | T | 0.028 | 46116 | -0.080 | 0.0137 | 5.50E-09 | -0.038 | 0.0157 | 0.017    |
| HT | 1:47333967:G:C   | G | 0.499 | 46116 | -0.024 | 0.0045 | 2.01E-07 | -0.011 | 0.0050 | 0.027    |
| HT | 4:17883363:T:C   | C | 0.136 | 46116 | -0.054 | 0.0066 | 4.66E-16 | -0.015 | 0.0070 | 0.033    |
| HT | 2:25240614:G:A   | A | 0.411 | 46116 | 0.031  | 0.0046 | 1.81E-11 | 0.011  | 0.0052 | 0.034    |
| HT | 1:16986959:G:A   | A | 0.234 | 46116 | -0.035 | 0.0053 | 4.65E-11 | -0.013 | 0.0063 | 0.034    |



|    |                 |   |       |       |        |        |          |        |        |       |
|----|-----------------|---|-------|-------|--------|--------|----------|--------|--------|-------|
| HT | 20:33745375:G:T | T | 0.252 | 45738 | -0.036 | 0.0052 | 8.83E-12 | -0.013 | 0.0060 | 0.035 |
| HT | 15:88857449:A:G | G | 0.029 | 46116 | -0.121 | 0.0136 | 6.20E-19 | -0.033 | 0.0161 | 0.041 |
| HT | 19:8605262:C:T  | T | 0.037 | 46116 | -0.100 | 0.0121 | 8.28E-17 | -0.028 | 0.0144 | 0.055 |
| HT | 6:34246545:C:G  | C | 0.090 | 46115 | 0.064  | 0.0079 | 6.18E-16 | 0.017  | 0.0090 | 0.063 |
| HT | 6:142403781:C:T | T | 0.278 | 46084 | -0.045 | 0.0050 | 2.96E-19 | -0.010 | 0.0055 | 0.064 |
| HT | 2:23958289:G:T  | T | 0.188 | 46088 | -0.033 | 0.0058 | 9.73E-09 | -0.012 | 0.0065 | 0.070 |
| HT | 2:55922340:C:G  | G | 0.192 | 46108 | -0.039 | 0.0057 | 1.04E-11 | -0.011 | 0.0060 | 0.071 |
| HT | 6:19838216:C:A  | A | 0.062 | 46116 | 0.076  | 0.0094 | 4.99E-16 | 0.017  | 0.0101 | 0.090 |
| HT | 15:61910283:C:T | C | 0.457 | 46116 | 0.024  | 0.0046 | 1.10E-07 | 0.008  | 0.0048 | 0.105 |
| HT | 8:129748784:G:C | C | 0.464 | 46112 | -0.024 | 0.0045 | 1.75E-07 | -0.007 | 0.0049 | 0.129 |
| HT | 17:63830956:G:A | A | 0.284 | 46115 | 0.036  | 0.0050 | 3.84E-13 | 0.010  | 0.0064 | 0.133 |
| HT | 1:149934520:T:C | C | 0.407 | 46116 | 0.040  | 0.0046 | 2.08E-18 | 0.007  | 0.0047 | 0.147 |
| HT | 6:34857885:T:C  | C | 0.138 | 46116 | 0.042  | 0.0066 | 2.51E-10 | 0.010  | 0.0075 | 0.191 |
| HT | 3:53099510:A:G  | A | 0.402 | 46031 | 0.028  | 0.0046 | 7.15E-10 | 0.006  | 0.0051 | 0.242 |
| HT | 6:151807942:T:C | C | 0.477 | 46116 | 0.027  | 0.0045 | 3.31E-09 | 0.005  | 0.0050 | 0.286 |
| HT | 6:34871867:G:A  | A | 0.016 | 46116 | -0.108 | 0.0182 | 3.25E-09 | -0.021 | 0.0205 | 0.298 |
| HT | 3:172447937:C:T | T | 0.313 | 46116 | 0.025  | 0.0049 | 2.36E-07 | 0.005  | 0.0051 | 0.357 |
| HT | 20:49158557:C:T | T | 0.238 | 46093 | 0.029  | 0.0053 | 7.51E-08 | 0.004  | 0.0059 | 0.473 |
| HT | 11:65965994:G:A | A | 0.061 | 46116 | -0.069 | 0.0095 | 3.48E-13 | -0.008 | 0.0106 | 0.474 |
| HT | 17:30784350:A:G | G | 0.177 | 46116 | -0.040 | 0.0060 | 1.40E-11 | -0.004 | 0.0065 | 0.520 |
| HT | 7:66286473:T:A  | A | 0.190 | 46066 | 0.030  | 0.0058 | 1.54E-07 | 0.004  | 0.0062 | 0.530 |
| HT | 1:88770346:T:A  | T | 0.458 | 45939 | -0.026 | 0.0045 | 1.58E-08 | -0.002 | 0.0046 | 0.640 |
| HT | 6:7727038:G:A   | A | 0.466 | 46116 | 0.033  | 0.0045 | 3.07E-13 | 0.002  | 0.0049 | 0.663 |
| HT | 19:4954443:G:A  | A | 0.198 | 46116 | -0.030 | 0.0057 | 9.09E-08 | 0.003  | 0.0063 | 0.667 |
| HT | 3:129301935:A:G | A | 0.219 | 46114 | -0.030 | 0.0055 | 4.05E-08 | -0.002 | 0.0058 | 0.743 |
| HT | 1:184051811:G:A | A | 0.348 | 46116 | 0.032  | 0.0048 | 2.46E-11 | 0.001  | 0.0050 | 0.778 |
| HT | 11:75566583:A:G | A | 0.115 | 46116 | 0.040  | 0.0071 | 1.34E-08 | 0.002  | 0.0077 | 0.800 |

|     |                  |   |       |       |        |        |          |         |        |          |
|-----|------------------|---|-------|-------|--------|--------|----------|---------|--------|----------|
| HT  | 12:123364549:C:G | G | 0.205 | 46116 | 0.032  | 0.0056 | 1.75E-08 | 0.001   | 0.0058 | 0.802    |
| HT  | 14:65075889:C:T  | T | 0.422 | 46116 | -0.025 | 0.0046 | 3.63E-08 | -0.001  | 0.0051 | 0.806    |
| HT  | 10:68199588:D:6  | G | 0.493 | 46094 | 0.025  | 0.0045 | 2.00E-08 | 0.001   | 0.0048 | 0.901    |
| HT  | 2:88575373:C:A   | C | 0.281 | 46116 | 0.030  | 0.0050 | 2.35E-09 | -0.001  | 0.0051 | 0.905    |
| HT  | 14:94378610:C:T  | T | 0.019 | 46116 | 0.117  | 0.0165 | 1.42E-12 | 0.001   | 0.0168 | 0.930    |
| HT  | 15:67165360:A:G  | G | 0.056 | 46116 | 0.069  | 0.0098 | 1.76E-12 | -0.001  | 0.0105 | 0.935    |
| HT  | 13:49663119:G:A  | A | 0.022 | 46116 | 0.083  | 0.0153 | 6.54E-08 | 0.001   | 0.0162 | 0.936    |
| HT  | 17:29562968:T:C  | T | 0.343 | 46116 | -0.029 | 0.0048 | 8.29E-10 | -0.0003 | 0.0051 | 0.958    |
| HT  | 9:96388497:A:G   | G | 0.163 | 46110 | 0.036  | 0.0061 | 3.68E-09 | -0.0003 | 0.0070 | 0.961    |
| HT  | 19:55482069:G:T  | T | 0.026 | 46116 | -0.073 | 0.0143 | 3.20E-07 | 0.0003  | 0.0153 | 0.986    |
| PEF | 9:133372523:G:C  | C | 0.137 | 41014 | -0.042 | 0.0078 | 6.20E-08 | -0.025  | 0.0078 | 0.001    |
| PR  | 20:44311053:C:T  | T | 0.015 | 37166 | 0.163  | 0.0297 | 3.95E-08 | 0.161   | 0.0297 | 5.74E-08 |
| PR  | 16:16056044:C:T  | T | 0.143 | 36809 | -0.054 | 0.0104 | 2.15E-07 | -0.055  | 0.0104 | 1.62E-07 |
| PR  | 20:38213354:T:C  | C | 0.474 | 37166 | -0.074 | 0.0073 | 1.82E-24 | -0.032  | 0.0073 | 8.64E-06 |
| PR  | 14:23396676:G:A  | A | 0.357 | 37166 | 0.070  | 0.0076 | 5.31E-20 | 0.003   | 0.0076 | 0.711    |
| PR  | 7:100889133:G:C  | C | 0.183 | 37166 | 0.052  | 0.0094 | 3.41E-08 | -0.001  | 0.0094 | 0.947    |
| PR  | 2:178856319:G:A  | A | 0.086 | 37166 | 0.094  | 0.0130 | 4.18E-13 | -0.001  | 0.0130 | 0.958    |
| SBP | 5:32713221:T:C   | C | 0.393 | 45659 | -0.035 | 0.0061 | 1.20E-08 | -0.013  | 0.0063 | 0.035    |
| SBP | 11:47792728:A:G  | G | 0.454 | 45643 | 0.031  | 0.0060 | 2.02E-07 | 0.007   | 0.0061 | 0.246    |
| SBP | 16:24823847:G:A  | A | 0.194 | 45659 | -0.044 | 0.0076 | 6.14E-09 | 0.001   | 0.0076 | 0.934    |
| SBP | 1:11823674:C:T   | T | 0.162 | 45659 | -0.049 | 0.0081 | 2.39E-09 | -0.0004 | 0.0085 | 0.966    |
| WT  | 9:108990879:G:T  | T | 0.075 | 46067 | 0.061  | 0.0109 | 2.13E-08 | 0.046   | 0.0111 | 3.18E-05 |
| WT  | 16:284580:G:C    | C | 0.284 | 46067 | -0.033 | 0.0064 | 1.90E-07 | -0.015  | 0.0065 | 0.020    |
| WT  | 1:177929986:G:C  | C | 0.206 | 46047 | 0.042  | 0.0071 | 2.78E-09 | 0.015   | 0.0073 | 0.033    |
| WT  | 2:36581207:C:T   | T | 0.349 | 44945 | 0.030  | 0.0059 | 2.96E-07 | 0.011   | 0.0060 | 0.076    |
| WT  | 15:67824962:T:A  | A | 0.225 | 46067 | -0.035 | 0.0068 | 2.82E-07 | -0.012  | 0.0070 | 0.093    |
| WT  | 16:30010081:C:T  | T | 0.394 | 46067 | 0.032  | 0.0058 | 6.71E-08 | 0.009   | 0.0060 | 0.123    |

|    |                 |   |       |       |        |        |          |        |        |       |
|----|-----------------|---|-------|-------|--------|--------|----------|--------|--------|-------|
| WT | 20:35434589:C:A | C | 0.346 | 46067 | 0.041  | 0.0060 | 1.61E-11 | 0.009  | 0.0062 | 0.154 |
| WT | 4:145159425:D:1 | A | 0.359 | 45981 | 0.031  | 0.0060 | 1.45E-07 | 0.004  | 0.0062 | 0.551 |
| WT | 17:30899634:A:G | G | 0.379 | 45665 | -0.032 | 0.0059 | 5.89E-08 | -0.003 | 0.0059 | 0.587 |
| WT | 12:882140:G:A   | A | 0.199 | 45425 | 0.038  | 0.0071 | 7.71E-08 | 0.002  | 0.0073 | 0.787 |
| WT | 11:27700751:G:T | T | 0.319 | 46067 | 0.033  | 0.0061 | 7.76E-08 | -0.001 | 0.0063 | 0.932 |
| WT | 18:60372043:C:T | T | 0.021 | 46067 | -0.105 | 0.0202 | 2.44E-07 | 0.001  | 0.0210 | 0.974 |

## Supplementary Figures

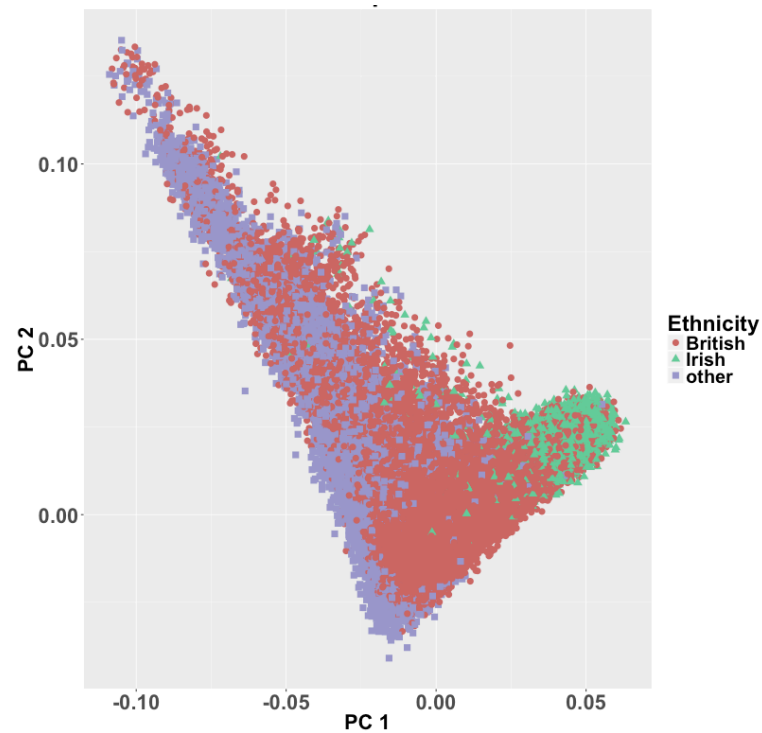

**Supplementary Figure 1.** The first and second principal components (PC1 and PC2) of all the UK Biobank participants of European ancestry compared to their self-reported ethnicity. The red dots represent the ones self-reported as “British”, the green dots represent those self-reported as “Irish”, and the purple dots represent those self-reported as “other-white background”.

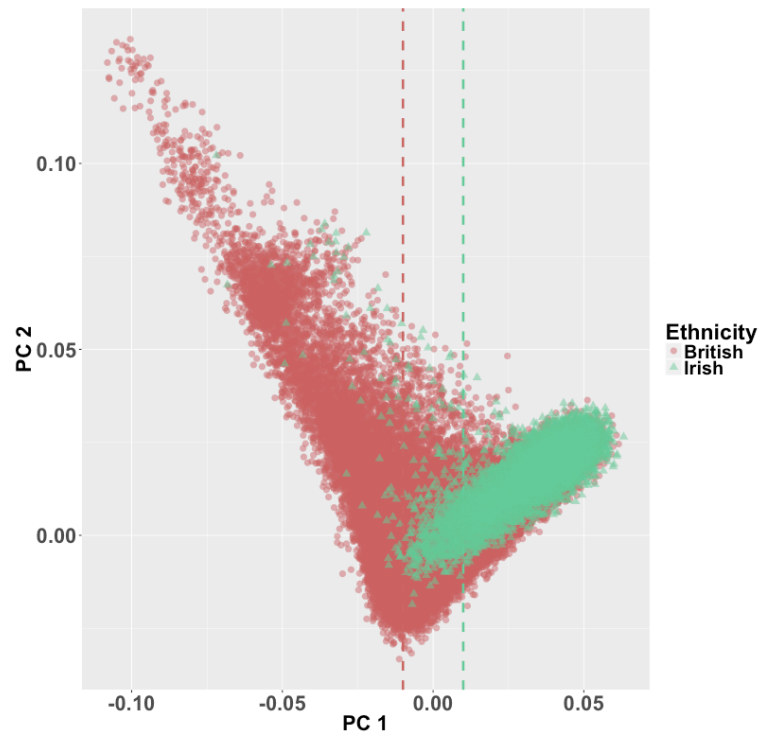

**Supplementary Figure 2.** The first and second principal components (PC1 and PC2) plotted against self-reported ethnicity among individuals of Irish and British ancestry from the UKB. In the simulation, we randomly selected 9,000 “Irish” individuals from the green dots on the right-hand side of the green vertical line ( $PC1 \geq 0.01$ ), and 9,000 “British” individuals from the red dots on the left-hand side of the red vertical line ( $PC1 \leq -0.01$ ) (see **Supplementary Note 1** for details of the simulation).

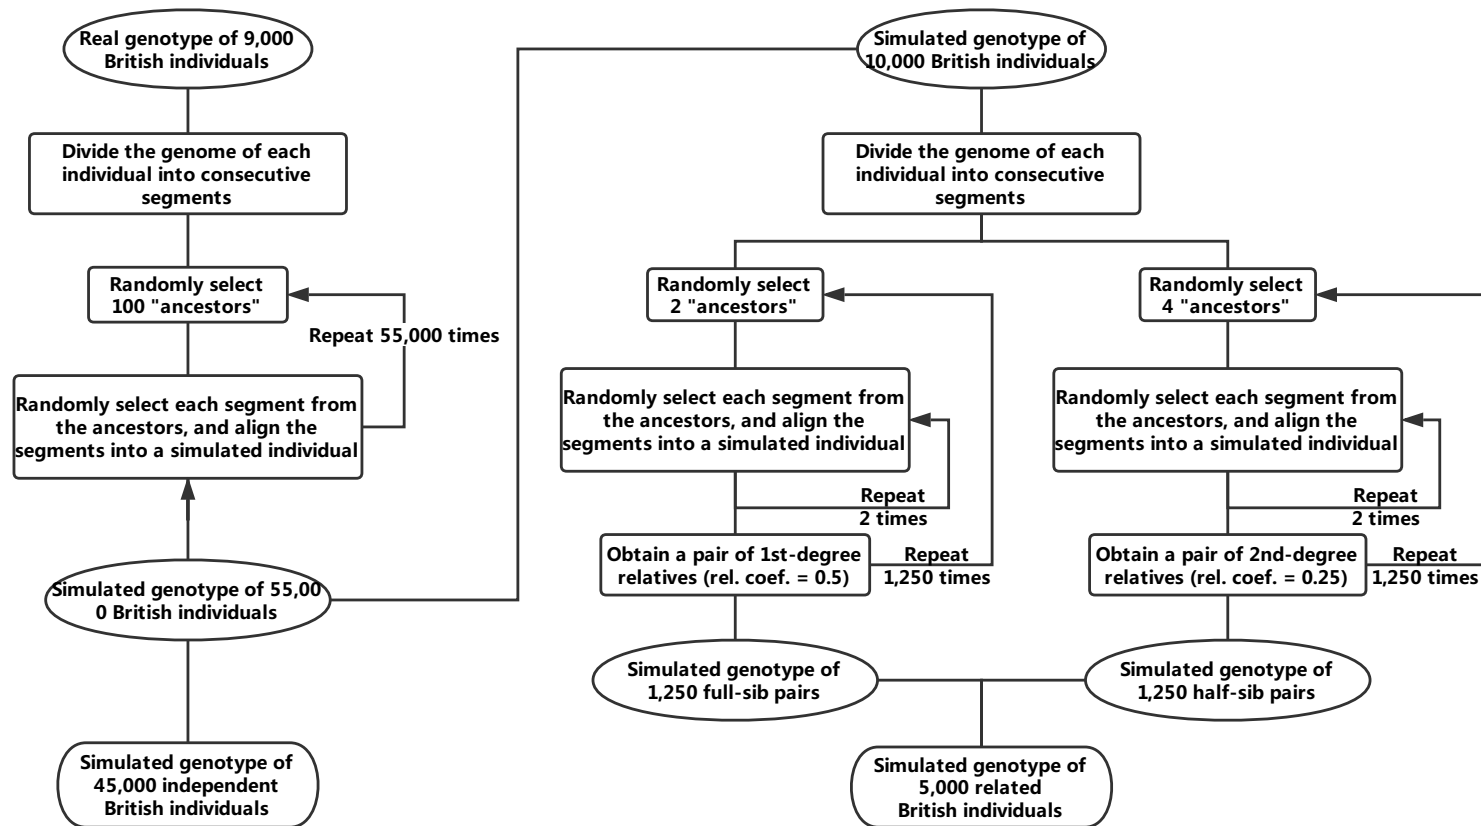

**Supplementary Figure 3.** Schematic diagram of simulating a GWAS data set with relatedness and population stratification from existing GWAS data.

“rel. coef.”: relatedness coefficient.

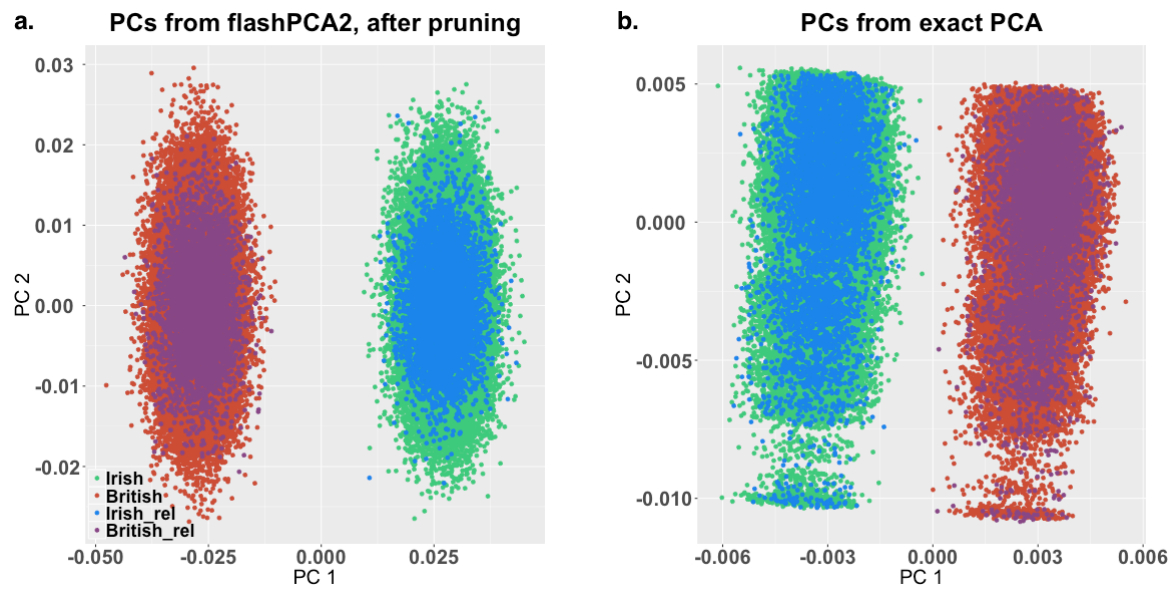

**Supplementary Figure 4.** Principal component analysis of all the 100,000 simulated individuals. The left panel (a) shows the first two PCs (PC1 and PC2) computed from a set of pruned SNPs (window size = 1 Mb, step size = 50 and LD  $r^2$  threshold = 0.05) by flashPCA2, while the right panel (b) shows the first two PCs from exact PCA without LD pruning implemented in GCTA. The red dots represent the simulated British individuals, while the green dots represent the simulated Irish individuals. In panels a) and b), the related individuals (relatedness coefficients  $\geq 0.05$ ) were labelled with a slightly darker colour in each group (Irish\_rel and British\_rel).

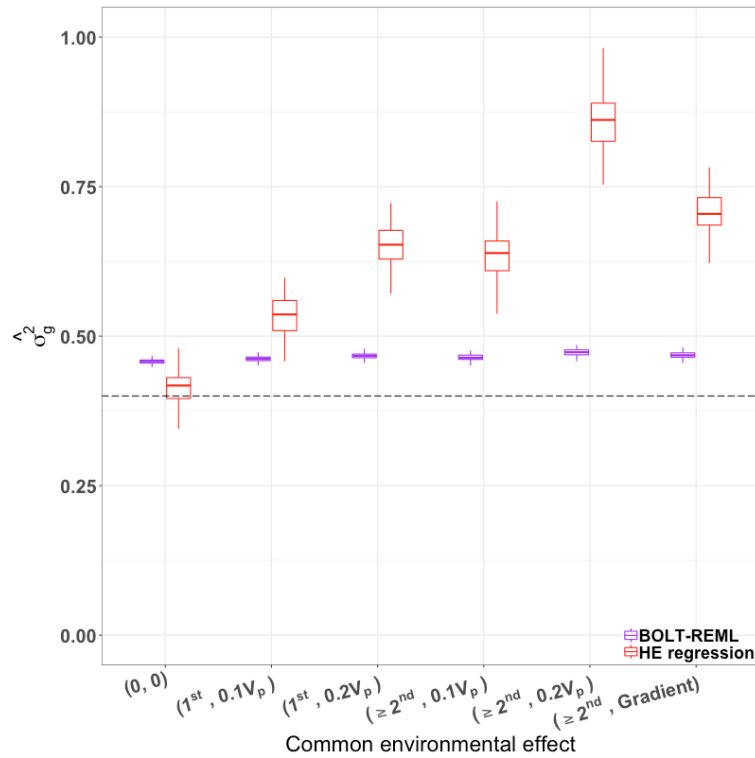

**Supplementary Figure 5.** Comparison of  $\hat{\sigma}_g^2$  between HE regression (used in fastGWA) and BOLT-REML (used in BOLT-LMM) at different levels of relatedness in simulations. The x-axis represents different levels of relatedness, where (0, 0) represents no common environmental effect; (1<sup>st</sup>, 0.1V<sub>p</sub>) or (1<sup>st</sup>, 0.2V<sub>p</sub>) represents that common environmental effects explained 10% or 20% of the phenotypic variance (V<sub>p</sub>) among 1<sup>st</sup> degree relatives; (≥2<sup>nd</sup>, 0.1V<sub>p</sub>) or (≥2<sup>nd</sup>, 0.2V<sub>p</sub>) represents that common environmental effects explained 10% or 20% of V<sub>p</sub> among all pairs of the 1<sup>st</sup> and 2<sup>nd</sup> degree relatives; (≥2<sup>nd</sup>, Gradient) represents that common environmental effects explained 20% of V<sub>p</sub> among the 1<sup>st</sup> degree relatives and 10% of V<sub>p</sub> among the 2<sup>nd</sup> degree relatives. The y-axis represents the value of  $\hat{\sigma}_g^2$ . The black dashed line represents the true simulation parameter ( $h^2 = 0.4$ ).



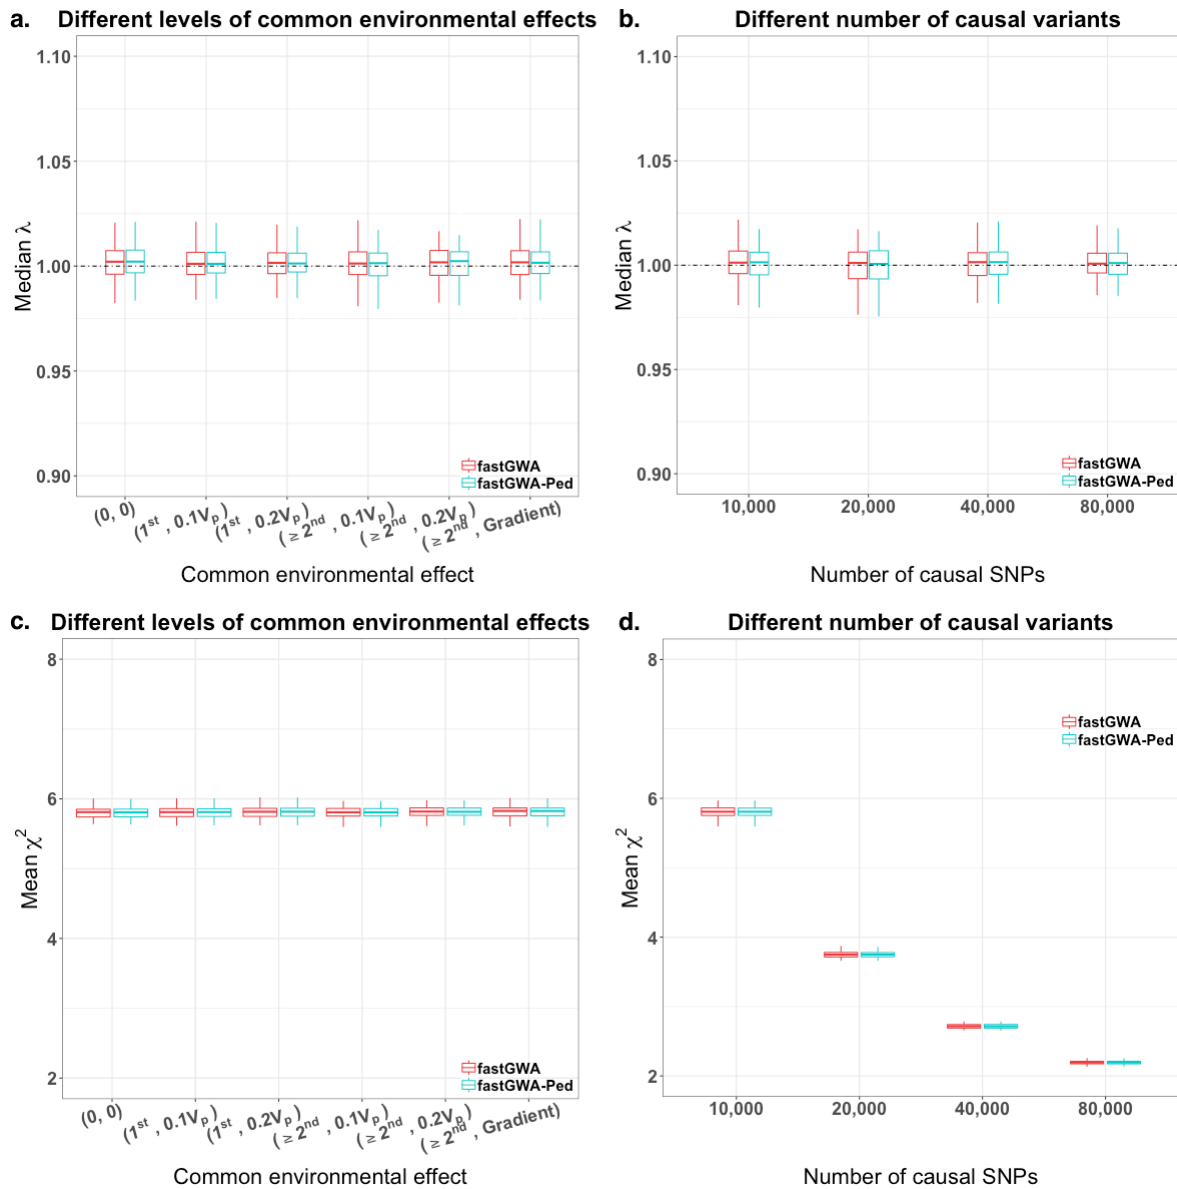

**Supplementary Figure 6.** Comparison between fastGWA and fastGWA-Ped. Panels a) and b) show the median  $\lambda$  of null SNPs for fastGWA and fastGWA-Ped, respectively. Panel a) shows the median  $\lambda$  with different levels of common environmental effects, and panel b) shows the median  $\lambda$  with different number of simulated causal variants. Panels c) and d) show the mean  $\chi^2$  value of causal SNPs for fastGWA and fastGWA-Ped. Panel c) shows the mean  $\chi^2$  value with different levels of common environmental effects, and panel d) shows the mean  $\chi^2$  value with different number of simulated causal variants. In all the panels, each box plot represents the distribution of the estimates (i.e., median  $\lambda$  and mean  $\chi^2$ ) across 100 simulation replicates.

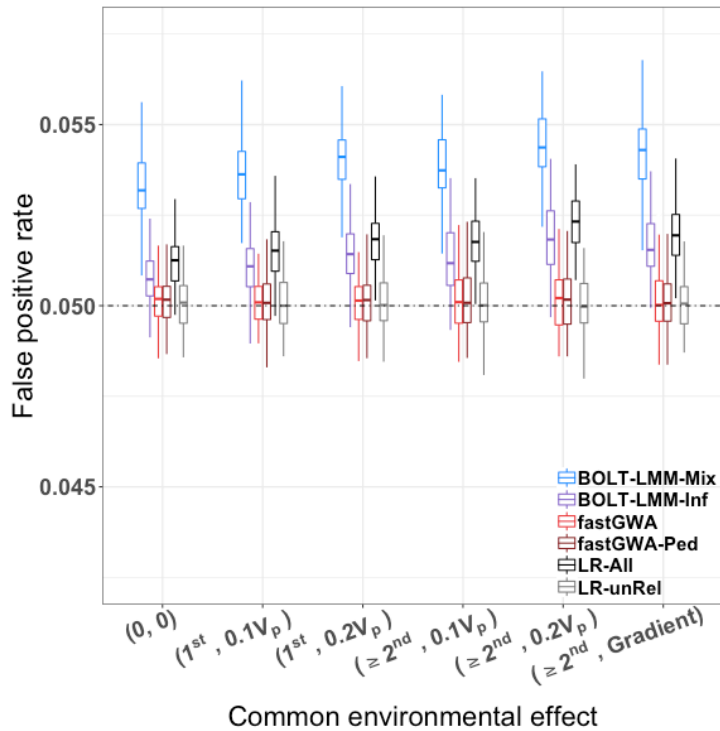

**Supplementary Figure 7.** Comparison of false positive rate (FPR) for different association methods. We used the simulated data as presented in Figures 1 and 2 to compute the FPR of each association method across different simulation scenarios with different levels of common environmental effects. Each boxplot represents the distribution of FPR across 100 simulation replicates.

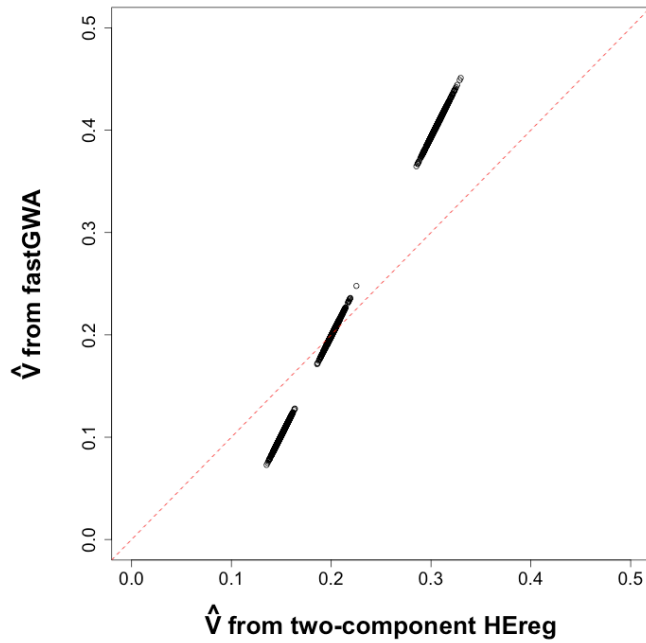

**Supplementary Figure 8.** Comparison of the estimated matrix  $V$  from a single-component model (i.e., the fastGWA model) with that from a the two-component model. Single-component model (fastGWA):  $\mathbf{y} = \mathbf{g} + \mathbf{e}$  with  $\mathbf{V} = \boldsymbol{\pi}\sigma_g^2 + \mathbf{I}\sigma_e^2$  (see Equation 1 in the main text for the definitions of all the parameters and variables). Two-component model:  $\mathbf{y} = \mathbf{g} + \mathbf{e}_c + \mathbf{e}$  with  $\mathbf{V} = \boldsymbol{\pi}\sigma_g^2 + \mathbf{C}\sigma_c^2 + \mathbf{I}\sigma_e^2$  where  $\mathbf{e}_c$  is a vector of shared environmental effects (see Equation 3 in the main text) and  $\mathbf{C}$  is a design matrix with 1 or 0 to indicate whether a pair of individuals belong to the same family. Shown are the result from the analyses of a simulated data set based on the simulation strategy described in **Supplementary Note 2**. We generated a sample of 1,000 pairs of first-degree relatives, 1,000 pairs of second-degree relatives, and 1,000 pairs of third-degree relatives. We then generated phenotype for each individual based on the two-component model with  $\sigma_g^2 = 0.4$ ,  $\sigma_c^2 = 0.2$  among the first-degree relatives,  $\sigma_c^2 = 0.1$  among the second-degree relatives, and  $\sigma_c^2 = 0$  among the third-degree relatives. We then estimated  $\hat{V}$  based on both the single- and two-component models using HE regression. Plotted are the non-zero off-diagonal elements of the estimated  $\hat{V}$  from fastGWA against those from the two-component model.

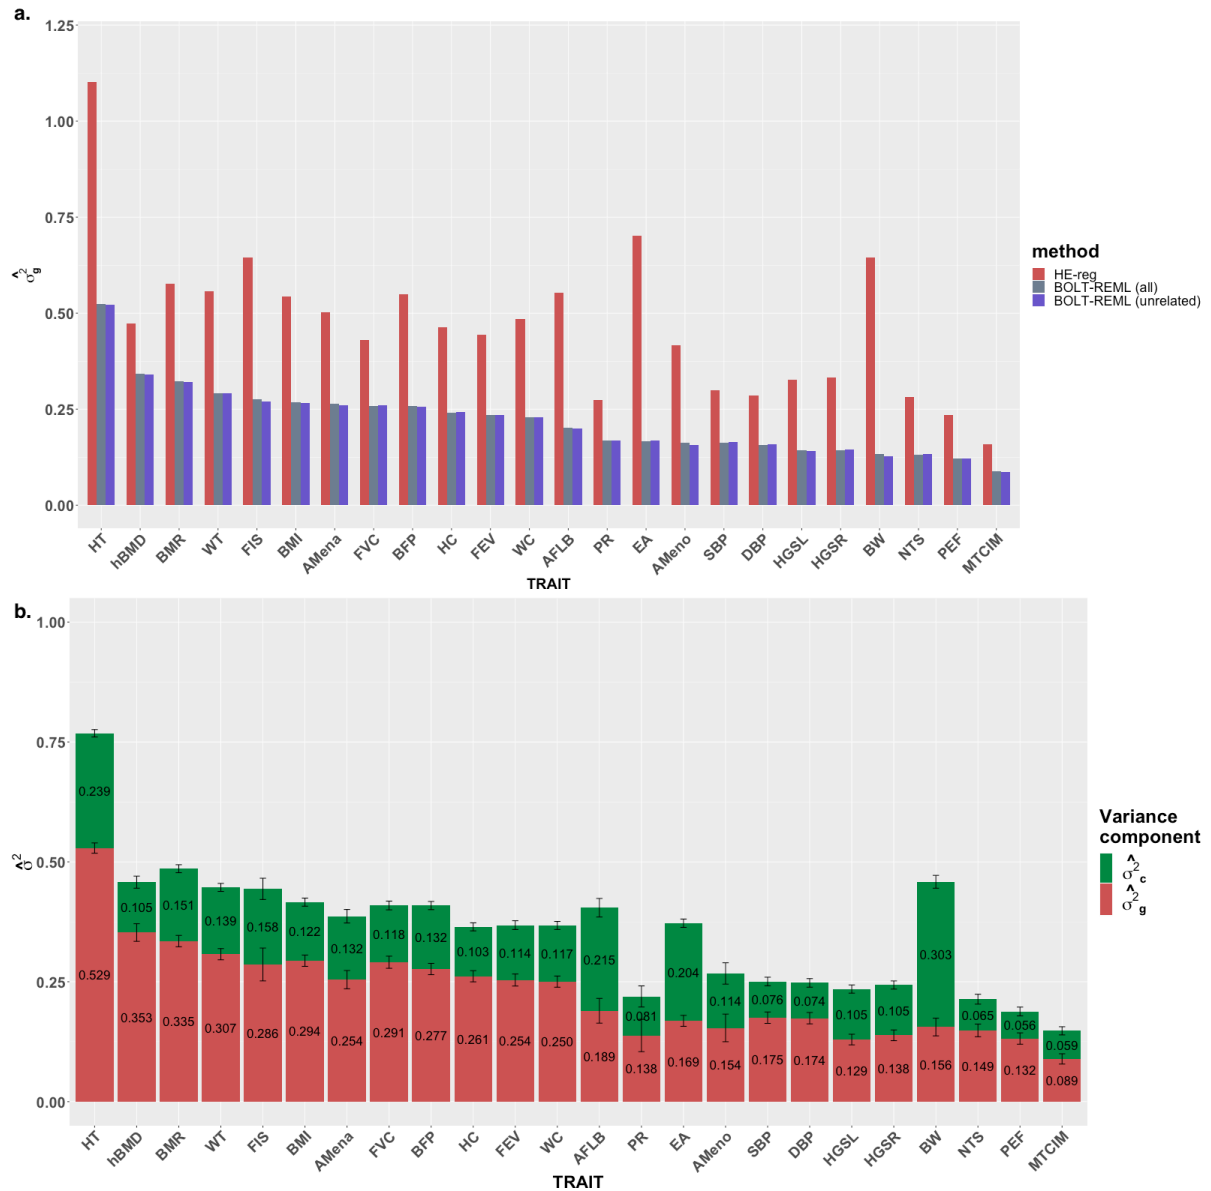

**Supplementary Figure 9.** Estimates of genetic variance by HE regression and BOLT-REML for 24 traits in the UKB. A full list of phenotype abbreviations can be found in **Supplementary Table 1**. Shown in panel a) are the estimates of the genetic variance (i.e.,  $\hat{\sigma}_g^2$ ) by HE regression based on the sparse GRM (used in fastGWA), by BOLT-REML<sup>1,15</sup> using all individuals (used in BOLT-LMM), and by a refined-version of BOLT-REML<sup>16</sup> using only unrelated individuals. In panel b), we analysed a subset of the UKB data (21,815 inferred full-sib pairs, consisting of 39,934 individuals from 19,386 families; see **Supplementary Note 3**) based on a two-component model:  $\mathbf{y} = \mathbf{g} + \mathbf{e}_c + \mathbf{e}$  with  $\mathbf{V} = \boldsymbol{\pi}\sigma_g^2 + \mathbf{C}\sigma_c^2 + \mathbf{I}\sigma_e^2$  where  $\mathbf{g}$  is a vector of total genetic effects,  $\mathbf{e}_c$  is a vector of shared environmental effects (see Equation 3 in the main text),  $\boldsymbol{\pi}$  is the full dense GRM estimated from the same slightly-clumped HapMap3 SNPs used in real data analyses ( $m = 565,631$ , see **Supplementary Note 3** for details), and  $\mathbf{C}$  is a design matrix with 1 or 0 to indicate whether a

pair of individuals belong to the same family. Standard errors of the estimates are represented by the error bars.

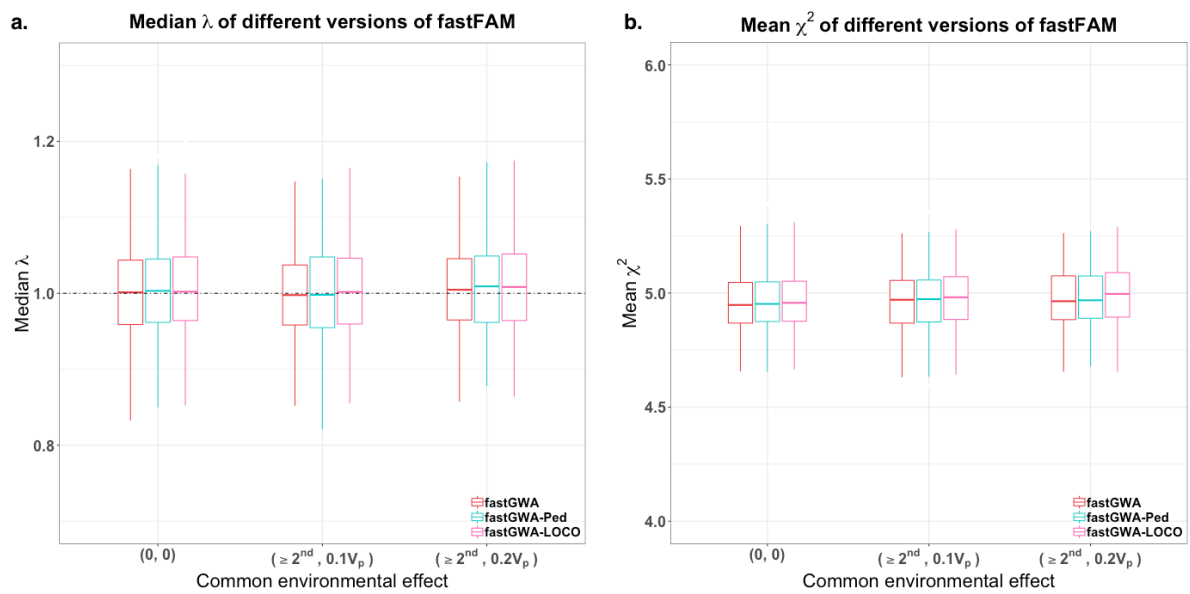

**Supplementary Figure 10.** Comparison of the power and inflation of fastGWA-LOCO with fastGWA and fastGWA-Ped. Shown are the results from the analyses of a simulated data set based on the simulation strategy described in **Supplementary Note 2** (with  $\sigma_g^2 = 0.4V_p$ ,  $\sigma_c^2 = 0.1V_p$ , or  $0.2V_p$  for all 1<sup>st</sup> and 2<sup>nd</sup> relatives and  $\sigma_c^2 = 0$  for all unrelated individuals).

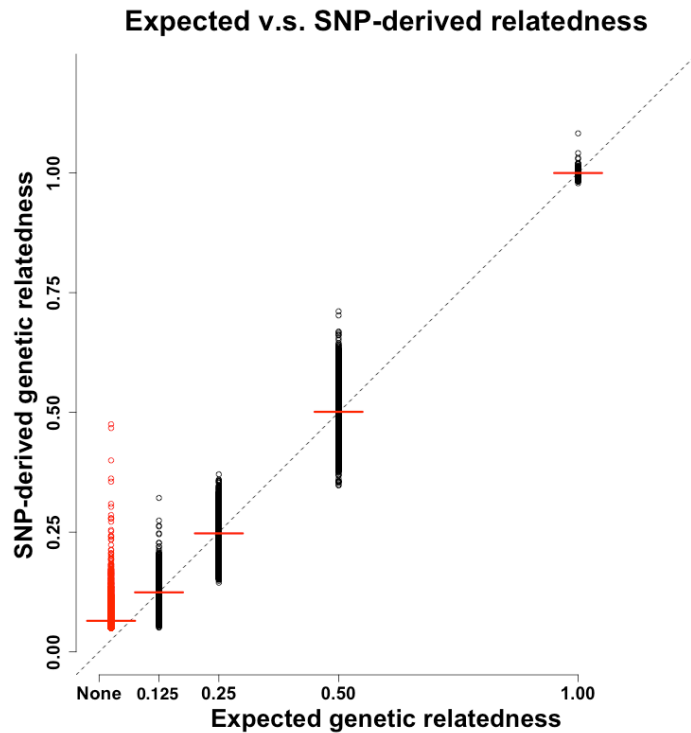

**Supplementary Figure 11.** A comparison between the reported genetic relatedness and the SNP-derived genetic relatedness of the UKB participants. The y-axis represents the SNP-derived genetic relatedness computed from GCTA using ~544k common SNPs on HapMap3 (178,075 individual pairs with estimated genetic relatedness  $\geq 0.05$ ). The x-axis represents the expected genetic relatedness based on the pedigree information provided by the UKB (monozygotic twin = 1, parent-offspring/full sib = 0.5, second degree relatives = 0.25, third degree relatives = 0.125, and unlabelled pair = 'none') on x-axis. Each circle represents one pair of relatives, the dashed diagonal line represents  $y = x$ , and the red horizontal lines represent the mean value of each relatedness group.

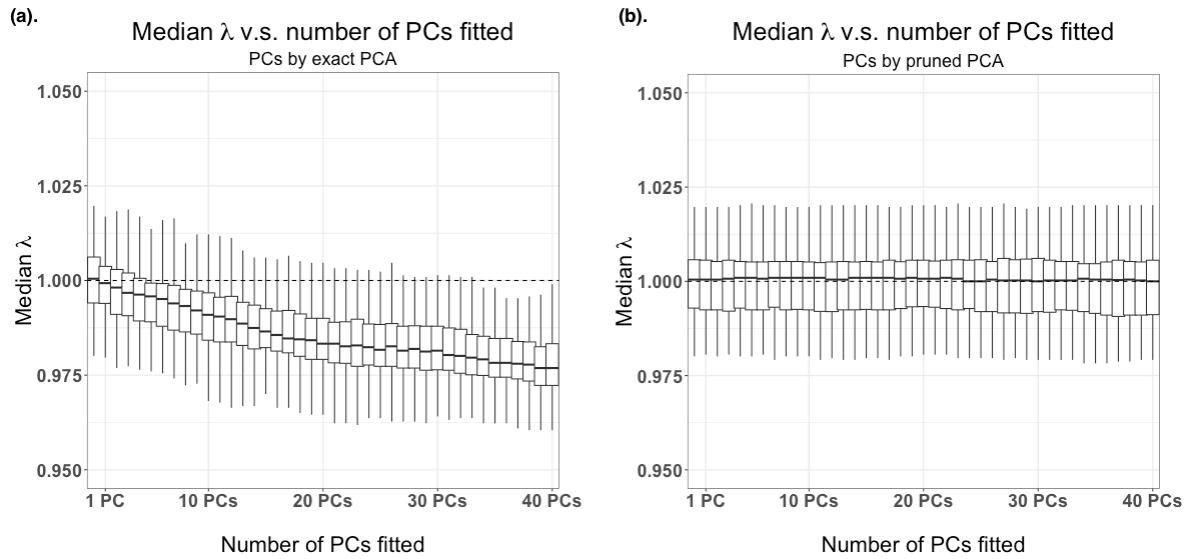

**Supplementary Figure 12.** The relationship between the test statistics (i.e., median  $\lambda$ ) and the number of PCs fitted in the simulation. The left panel shows the results of fitting PCs by exact PCA (all SNPs without pruning), while the right panel shows the results of fitting PCs by PCA using LD-pruned SNPs. The phenotypes were adjusted by different number of top PCs (ranging from 1 to 40). The association analyses were performed using PLINK (linear regression). The median  $\lambda$  was computed from of all the null SNPs (i.e., SNPs on even chromosomes). Each boxplot represents the distribution of median  $\lambda$  across 100 simulation replicates.



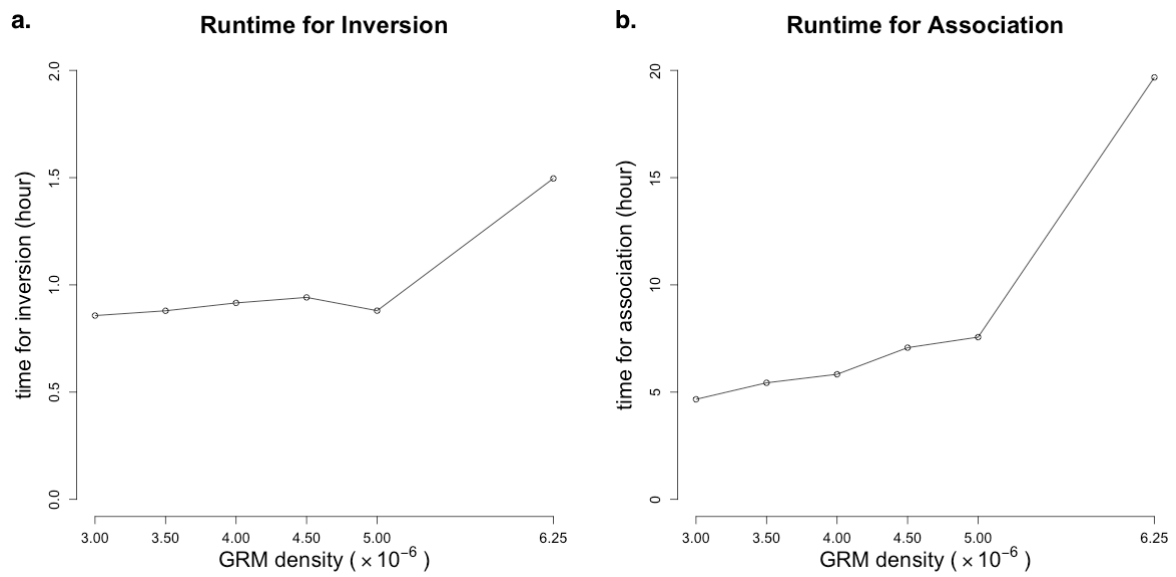

**Supplementary Figure 13.** The relationship between GRM density and the runtime of fastGWA. a) runtime for inverting the variance-covariance matrix. b) runtime for association test. The x-axis represents different levels of GRM density. The total sample size was fixed to be 400,000, and the number of related pairs ranged from 40,000 (GRM density =  $3 \times 10^{-6}$ ) to 300,000 (GRM density =  $6.25 \times 10^{-6}$ ).

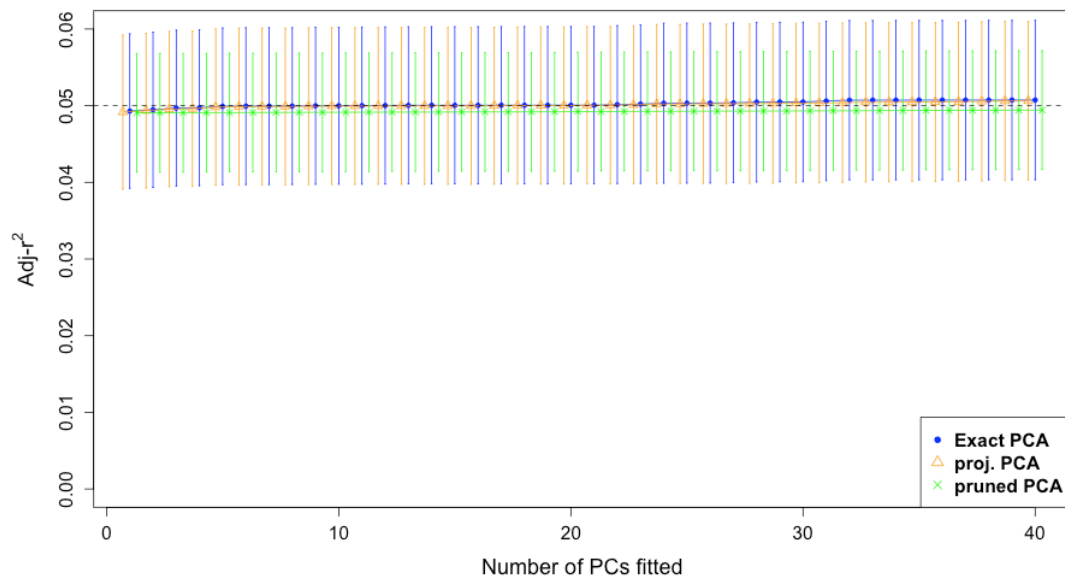

**Supplementary Figure 14.** Proportion of phenotypic variance explained by the top 40 PCs computed from different PCA methods in the simulation. Adjusted  $r^2$  (adjusted coefficient of determination) was plotted against the different number of PCs fitted in the model. Three methods, the Exact PCA (Exact PCA, implemented in GCTA) using all SNPs, the PC projection approach (proj. PCA, implemented in GCTA) using all SNPs, and flashPCA2 (pruned PCA) using a set of LD-pruned SNPs, are compared. The dash line represented the parameter used to simulate the proportion of variance explained by population stratification. Each dot represents the average across 100 simulation replicates.

## Supplementary References

1. Loh, P.-R., et al. Efficient Bayesian mixed-model analysis increases association power in large cohorts. *Nat Genet* (2015).
2. Abecasis, G.R., Cardon, L.R. & Cookson, W. A general test of association for quantitative traits in nuclear families. *The American Journal of Human Genetics* **66**, 279-292 (2000).
3. Lange, C., DeMeo, D.L. & Laird, N.M. Power and design considerations for a general class of family-based association tests: quantitative traits. *The American Journal of Human Genetics* **71**, 1330-1341 (2002).
4. Yu, J. *et al.* A unified mixed-model method for association mapping that accounts for multiple levels of relatedness. *Nature genetics* **38**, 203-208 (2006).
5. Chen, W.-M. & Abecasis, G.R. Family-based association tests for genomewide association scans. *The American Journal of Human Genetics* **81**, 913-926 (2007).
6. International HapMap 3 Consortium. Integrating common and rare genetic variation in diverse human populations. *Nature* **467**, 52 (2010).
7. Manichaikul, A. *et al.* Robust relationship inference in genome-wide association studies. *Bioinformatics* **26**, 2867-73 (2010).
8. Bycroft, C. *et al.* The UK Biobank resource with deep phenotyping and genomic data. *Nature* **562**, 203-209 (2018).
9. Abraham, G., Qiu, Y. & Inouye, M. FlashPCA2: principal component analysis of Biobank-scale genotype datasets. *Bioinformatics* **33**, 2776-2778 (2017).
10. Price, A.L. *et al.* Principal components analysis corrects for stratification in genome-wide association studies. *Nat Genet* **38**, 904-9 (2006).
11. Galinsky, K.J. *et al.* Fast principal-component analysis reveals convergent evolution of ADH1B in Europe and East Asia. *The American Journal of Human Genetics* **98**, 456-472 (2016).
12. Bulik-Sullivan, B.K. *et al.* LD Score regression distinguishes confounding from polygenicity in genome-wide association studies. *Nat Genet* **47**, 291-5 (2015).
13. Genomes Project Consortium. An integrated map of genetic variation from 1,092 human genomes. *Nature* **491**, 56 (2012).
14. Yang, J., Lee, S.H., Goddard, M.E. & Visscher, P.M. GCTA: a tool for genome-wide complex trait analysis. *Am J Hum Genet* **88**, 76-82 (2011).
15. Loh, P.R., Kichaev, G., Gazal, S., Schoech, A.P. & Price, A.L. Mixed-model association for biobank-scale datasets. *Nat Genet* **50**, 906-908 (2018).
16. Loh, P.R. *et al.* Contrasting genetic architectures of schizophrenia and other complex diseases using fast variance-components analysis. *Nat Genet* **47**, 1385-92 (2015).
